# Supplementary material for: Tcf7l1 protects the anterior neural fold from adopting the neural crest fate
Source: Oxford University Press journal article supplement (doi:10.1242/dev.132357), 2016-06-14
Supplement: dev132357supp.pdf [file dev132357supp.pdf]

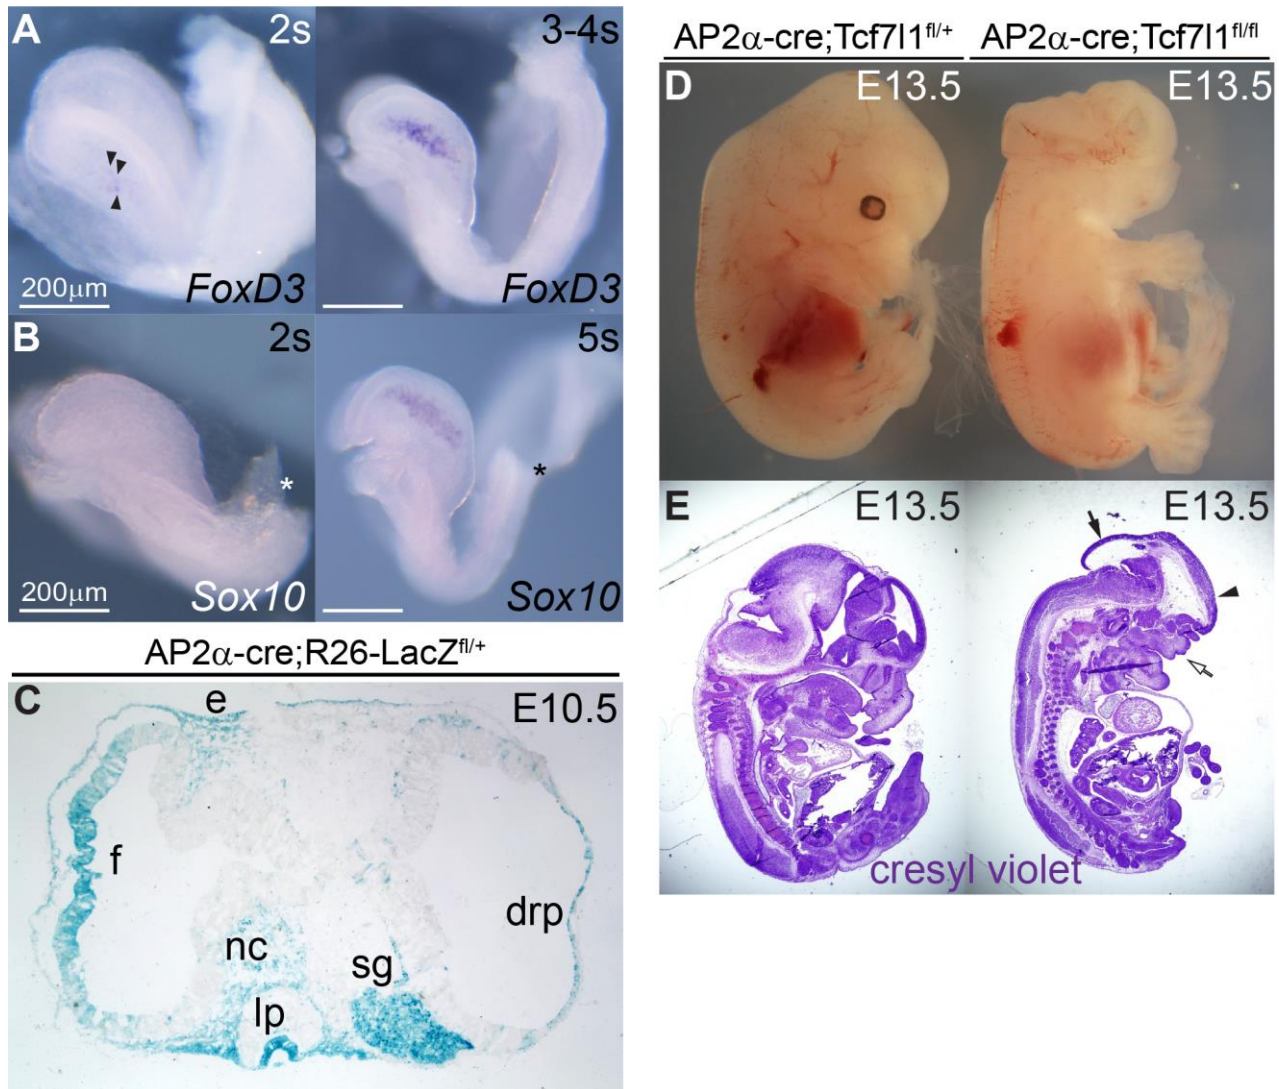

**Fig. S1. Expression of NC genes at E8 and gross morphology of AP2α-Cre;Tcf711<sup>fl/fl</sup> mutants embryos.** (A,B) Expression of NC genes during early mouse embryogenesis. RNA *in situ* hybridisation of *FoxD3* at stages 2s and 3-4s (A) and *Sox10* at stages 2s and 5s (B). \* artefact caused by embryo dissection. (C) Mapping of AP2α-Cre recombination activity. A transverse section of AP2α-Cre;*Rosa26*<sup>LacZ<sup>fl/+</sup></sup> embryo at E10.5. Cre activity was detected using β-galactosidase enzyme assay. (D) *Tcf711* deletion results in exencephaly. (E) Histological analysis of sagittal sections from the AP2α-Cre;*Tcf711*<sup>fl/fl</sup> “strong” mutant at E13.5 sections stained with cresyl violet show severe defects in the splanchnocranium, the forebrain (arrowhead) and midbrain (arrow).

Drp, dorsal roof plate; e, surface ectoderm; f, forebrain; lp, lens pit; nc-neural crest; sg, sensory ganglion.

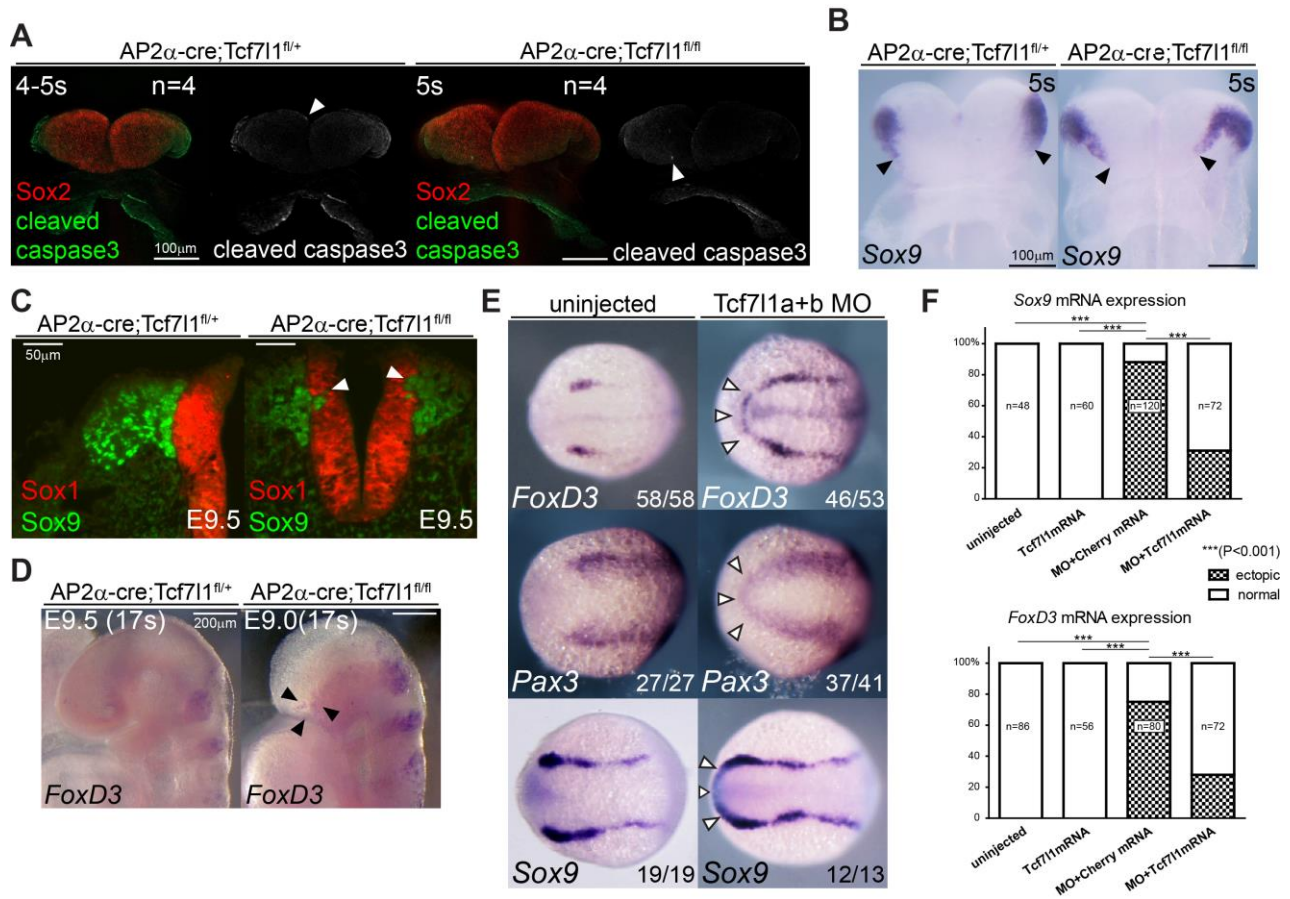

**Fig. S2. Expansion of NC markers after ablation of Tcf711 in mouse and zebrafish. (A)** Apoptosis is not altered in Tcf711 mouse mutant embryos at 5s stage as analyzed by immunofluorescence using anti-Caspase3 antibody, frontal view on the ANF, arrowheads points at one positive cell in each embryo. **(B)** Sox9 mRNA expands rostrally in AP2 $\alpha$ -Cre;Tcf711<sup>fl/fl</sup> mutant at 5s stage. Expansion of Sox9 is marked by arrowheads. **(C)** Immunohistological staining of transverse sections from the hindbrain at E9.0 revealed ectopic Sox9-positive/Sox1-negative cells (arrowheads) in AP2 $\alpha$ -Cre;Tcf711<sup>fl/fl</sup> mutants. **(D)** Aberrant FoxD3 mRNA expression (arrowheads) in Tcf711 conditional mutants at E9.0. **(E)** Morpholino (MO) knock-down of Tcf711a and Tcf711b variants in zebrafish at 12hpf stage. Expression of FoxD3, Pax3 and Sox9 mRNA expands anteriorly along the anterior NPB in Tcf711 morphants (arrowheads). **(F)** Rescue of Tcf711 morphants using co-injection of mouse Tcf711 mRNA and control mRNA Cherry. Quantification of the ectopic expression shown in (E, arrowheads) and normal pattern of Sox9 and FoxD3 transcripts. Statistical significance was calculated using Fishers test.

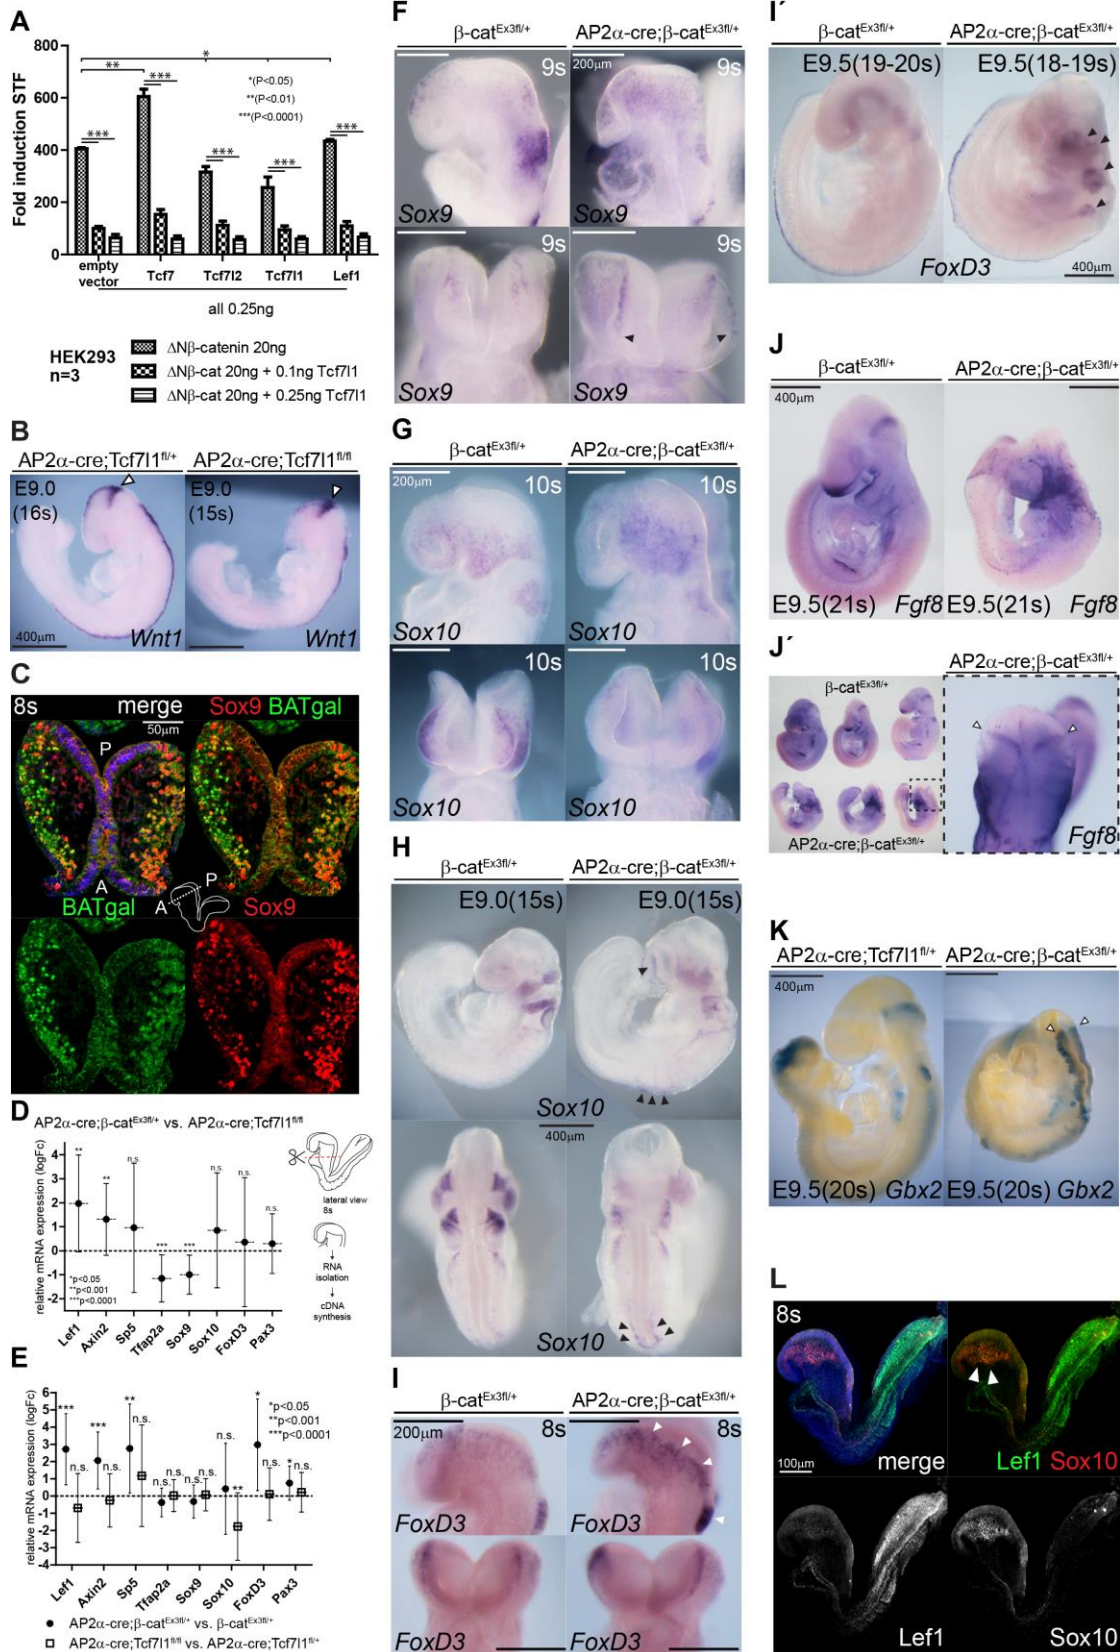

**Fig. S3. Analysis of NC cells in AP2 $\alpha$ -Cre; $\beta$ -cat<sup>Ex3fl/+</sup> embryos. (A)** SuperTopFlash luciferase reporter assay in HEK293 cells documents Tcf711 ability to repress Tcf/Lef driven gene expression. Activation of the pathway was achieved by co-transfection with non-degradable form of  $\beta$ -catenin ( $\Delta$ N $\beta$ -catenin). Statistical significance was calculated using Student's *t*-test. Error bars indicate  $\pm$  SD. **(B)** The expression of *Wnt1* transcripts is unchanged in the MHB (arrowhead) of AP2 $\alpha$ -Cre;Tcf711<sup>fl/fl</sup> mutants at E9.0. **(C)** Sox9 and BAT-gal immunostaining of transverse sections of 8s wild-type embryos. Please note the large overlap between the Sox9-positive and BAT-gal-positive delaminating cells. Nuclei were counterstained with DAPI. **(D)** qRT-PCR graph showing differential expression of Wnt target genes and genes involved in the NC induction and specification. Samples from dissected heads of the AP2 $\alpha$ -Cre; $\beta$ -cat<sup>Ex3fl/+</sup> vs. AP2 $\alpha$ -Cre;Tcf711<sup>fl/fl</sup> mutants at 6-12s stage, n=6 for each genotype. Values are in log2 scale, Statistical significance was calculated by a two-tailed Student's *t*-test. Error bars indicate  $\pm$  SD. **(E)** qRT-PCR graph showing differential expression of Wnt target genes and genes involved in the NC induction and specification. Samples from dissected heads of the AP2 $\alpha$ -Cre; $\beta$ -cat<sup>Ex3fl/+</sup> vs.  $\beta$ -cat<sup>Ex3fl/+</sup> (full circles) and AP2 $\alpha$ -Cre;Tcf711<sup>fl/fl</sup> vs. AP2 $\alpha$ -Cre;Tcf711<sup>fl/+</sup> (empty squares) at 6-12s stage, n=5 for each genotype. Values are in log2 scale, Statistical significance was calculated by a two-tailed Student's *t*-test. Error bars indicate  $\pm$  SD. **(F-G)** RNA *in situ* hybridisation of Sox9 (F) and Sox10 (G) in AP2 $\alpha$ -Cre; $\beta$ -cat<sup>Ex3fl/+</sup> mutants showing anterior expansion of Sox9 (arrowheads) but reduced and more dispersed expression of Sox10 at 8s stage. Side (top) and frontal view (bottom). **(H)** Sox10 is expressed in higher levels in the anterior head and caudal trunk (arrowheads) of the AP2 $\alpha$ -Cre; $\beta$ -cat<sup>Ex3fl/+</sup> mutants than in the controls at E9.5. Side (top) and frontal view (bottom). **(I,I')** *Foxd3* expression is more abundant in AP2 $\alpha$ -Cre; $\beta$ -cat<sup>Ex3fl/+</sup> mutants than in the controls at 8s (white arrowheads) (I) and E9.5 stage (black arrowheads). Side (top) and frontal view (middle) are shown at 8s stage, and side (bottom) view is shown for E9.5 (I'). **(J-J')** *Fgf8* mRNA is abnormally spread in large areas around branchial arches but it is detected in the MHB (arrowheads) of AP2 $\alpha$ -Cre; $\beta$ -cat<sup>Ex3fl/+</sup> mutants. **(K)** MHB marker *Gbx2* is ectopically expressed caudally from MHB (marked by arrowheads) in the AP2 $\alpha$ -Cre; $\beta$ -cat<sup>Ex3fl/+</sup> mutants at E9.5. **(L)** Whole mount immunofluorescence showing overlapping expression of Lef1 and Sox10 in NC cells (arrowheads) in wild-type embryo at 8s stage. Nuclei were stained with Hoechst.

A, anterior; P, posterior.

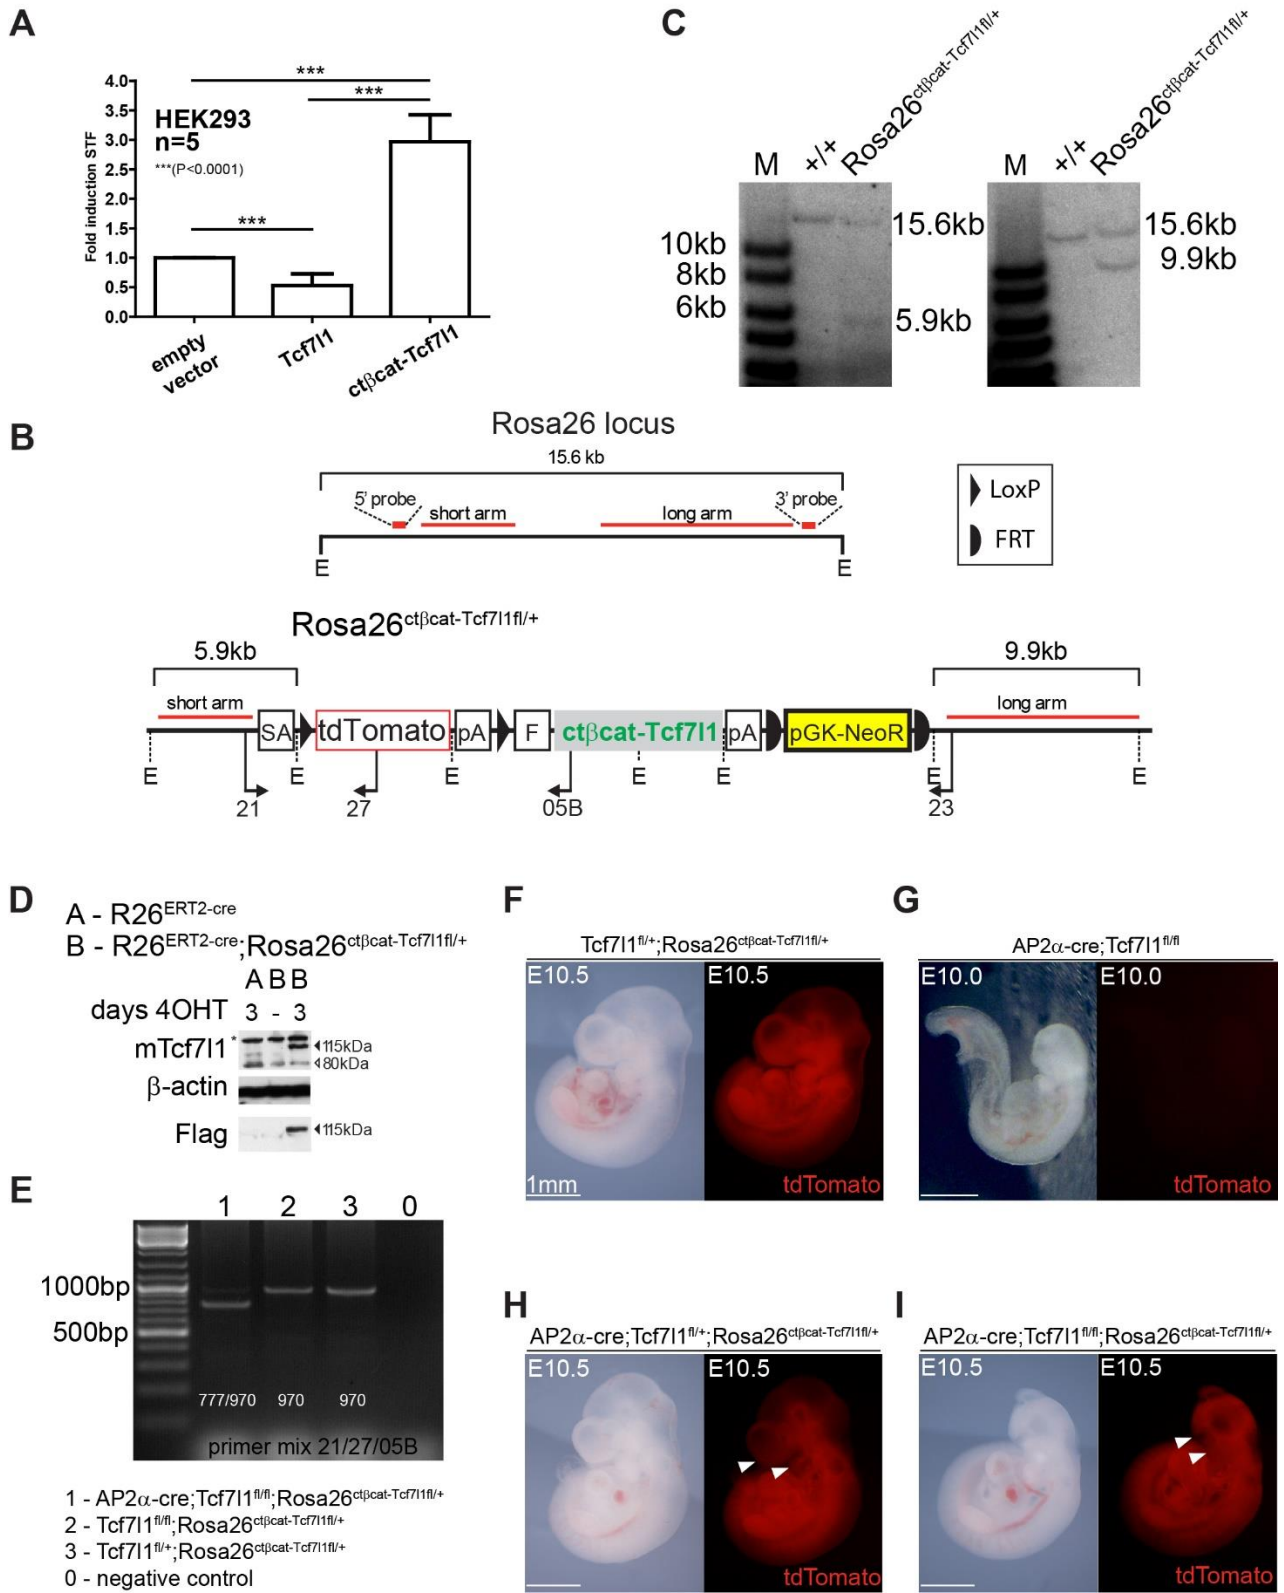

**Fig. S4. Generation and validation of the mouse strain Rosa26<sup>ct $\beta$ cat-Tcf711<sup>fl/+</sup></sup>.** (A) SuperTopFlash assay in HEK293 cells shows ct $\beta$ cat-Tcf711 mediated activation and Tcf711 mediated repression of the Tcf/Lef reporter. Statistical significance was calculated using Student's *t*-test. Error bars indicate  $\pm$  SD. (B) Scheme of the Rosa26 locus and the targeting vector, homology arms are depicted in red. (C) Southern blotting analysis confirms correct homologous recombination in ES cells, short arm is on the left. (D) Western blotting of lysates from mouse embryonic fibroblasts (MEFs) isolated from the R26<sup>ERT2-cre</sup>;Rosa26<sup>ct $\beta$ cat-Tcf711<sup>fl/+</sup></sup> embryos revealed the presence of the ct $\beta$ cat-Tcf711 fusion protein 3 days after administration of 4-OHT (4-hydroxitamoxifen). Size of the endogenous Tcf711 is approximately 80kDa, ct $\beta$ cat-Tcf711 protein size is around 115kDa. (E) PCR confirmation of Cre recombination in AP2 $\alpha$ -Cre;Tcf711<sup>fl/fl</sup>; Rosa26<sup>ct $\beta$ cat-Tcf711<sup>fl/+</sup></sup> compound mutants, resulting size of the PCR products was 970bp prior and 777bp after recombination. (F-I) Rosa26<sup>ct $\beta$ cat-Tcf711<sup>fl/+</sup></sup> mice ubiquitously express fluorescent protein tdTomato. The loss of its expression upon Cre recombination is marked by arrowheads in the AP2 $\alpha$ -Cre;Tcf711<sup>fl/fl</sup>;Rosa26<sup>ct $\beta$ cat-Tcf711<sup>fl/+</sup></sup> embryos (H) and the AP2 $\alpha$ -Cre;Tcf711<sup>fl/fl</sup>;Rosa26<sup>ct $\beta$ cat-Tcf711<sup>fl/+</sup></sup> compound mutants (I). AP2 $\alpha$ -Cre;Tcf711<sup>fl/fl</sup> serves as a negative control (G).

E, EcoRI cleavage site; SA, splice acceptor; pA, poly-adenylation signal; pGK-NeoR, neomycin expressing cassette; F, Flag tag sequence; \*, non-specific binding of the antibody; primers for genotyping 21-JM21F, 23-JM23R, 27-JM27R, 05-JM05B.

**Supplemental Table S1 (Related to Materials and methods)**

| ISH probes |                            |                                 |
|------------|----------------------------|---------------------------------|
| Gene       | forward                    | reverse                         |
| FoxD3      | GGACCGCAAGAGTTCGCGGA       | TCCGGAGCTCCCGTGTCGTT            |
| Sox9       | GAGCACTCTGGGCAATCTCAG      | CTCAGGGTCTGGTGAGCTGTG           |
| Gbx2       | Gift from Peter Rathjen    | Adelaide University             |
| Sp5        | CGTGAAGACGCACCAAATA        | TATTTTCACGCTGCCAACTG            |
| Fgf8       | CAGGTCCTGGCCAACAAG         | GAGCTCCCGCTGGATTCTT             |
| Sox10      | Gift from Anthony Firulli  | Indiana University, USA         |
| Sox2       | Open Biosystems            | BC057574                        |
| FoxG1      | Gift from Stefan Krauss    | OUS, Oslo, Norway               |
| Six3       | Gift from Guillermo Oliver | St. Jude Hospital, Memphis, USA |
| Wnt1       | Gift from Andy McMahon     | USC, USA                        |
| Tcf711     | Open Biosystems            | BC128306                        |
| Tcf712     | Open Biosystems            | BC052022                        |
| Pax3       | ACTGTCTGTGATCGGAACACT      | CTAGAACGTCCAAGGCTTACT           |

| <b>Antibodies</b>      |                             |                       |
|------------------------|-----------------------------|-----------------------|
| Gene                   | Company                     | Dilution              |
| Sox1                   | R&D AF3369                  | 1:1000                |
| Tfap2 $\alpha$         | Sanata Cruz Biotech SC-184  | 1:1000                |
| Sox10                  | Santa Cruz Biotech SC-17342 | 1:1000                |
| Sox9                   | Millipore AB5535            | 1:2000                |
| N-cadherin             | BD Transduction Lab. 610920 | 1:2000                |
| GFP                    | Life Technologies A11122    | 1:1000                |
| $\beta$ -galactosidase | Abcam ab9361-250            | 1:1000                |
| Lef1                   | Cell Siganling C12A5        | 1:1000                |
| cleaved caspase-3      | Cell Signaling 9664         | 1:2000                |
| <b>qPCR Primers</b>    |                             |                       |
| Axin2                  | AGCTTCCGCGAGGATGCTCC        | TGCACCAATCCTGGTCACCCA |
| Tfap2                  | CACGAGGACCTCTTGACCGG        | GTTGGACTTGGACAGGGACA  |
| Sox9                   | AGGAAGCTGGCAGACCAGT         | TCCACGAAGGGTCTCTTCTC  |
| Sox10                  | ATGTCAGATGGGAACCCAGA        | CACGTTGCCGAAGTCGATGT  |
| Pax3                   | AGGAGGCGGATCTAGAAAG         | TCAGCGGTAAATCAGGTTCA  |
| Sp5                    | AAGCAACACGTGTGCCACGT        | GTCTTCACGTGCTTGGCGAG  |
| FoxD3                  | ATCCTGGTCCATCTGTCCTG        | GTAATCCGGGTGTTCCCTTCA |
| Lef1                   | CCTTTCTCCACCCATCCCGA        | ACAGGCTGACCTTGCCAGCC  |
